# Supplementary material for: Amphiphobic polyHIPEs with pH-triggered transition to hydrophilicity–oleophobicity for the controlled removal of water from oil–water mixtures
Source: Royal Society of Chemistry journal article supplement (doi:10.1039/d0py01144d), 2020-01-01
Supplement: d0py01144d1.pdf [file d0py01144d1.pdf]

*Electronic Supporting Information (ESI)*

**Amphiphobic polyHIPEs with pH-triggered transition to hydrophilic-oleophobic for controlled removal of water from oil-water mixtures**

Xiaomin Li<sup>a</sup>, Tao Zhang<sup>a,b\*</sup>, Zhiguang Xu<sup>c</sup>, Huanjie Chi<sup>a</sup>, Zhu Wu<sup>a</sup> and Yan Zhao<sup>a,\*</sup>

<sup>a</sup> College of Textile and Clothing Engineering, Soochow University, Suzhou 215123, China.

<sup>b</sup> Jiangsu Guowang High-Technique Fiber Co., Ltd, Suzhou 215228, China.

<sup>c</sup> China-Australia Institute for Advanced Materials and Manufacturing, Jiaxing University, Jiaxing 314001, China.

Corresponding authors:

[zhang.tao@suda.edu.cn](mailto:zhang.tao@suda.edu.cn) (T. Zhang)

[yanzhao@suda.edu.cn](mailto:yanzhao@suda.edu.cn) (Y. Zhao)

## 1. Experimental

**Table S1** Recipes and properties of the RH-X-Ys

|                                                               | RH-20-5   | RH-35-5   | RH-50-5   | RH-35-3   | RH-35-7   |
|---------------------------------------------------------------|-----------|-----------|-----------|-----------|-----------|
| <i>Continuous aqueous phase (g)</i>                           |           |           |           |           |           |
| DEAEMA                                                        | 0.50      | 0.90      | 1.30      | 0.90      | 0.90      |
| AAm                                                           | 1.80      | 1.40      | 1.00      | 1.40      | 1.40      |
| MBAAm                                                         | 0.25      | 0.25      | 0.25      | 0.25      | 0.25      |
| F127                                                          | 0.60      | 0.60      | 0.60      | 0.60      | 0.60      |
| H <sub>2</sub> O                                              | 8.40      | 8.40      | 8.40      | 8.40      | 8.40      |
| Total                                                         | 11.55     | 11.55     | 11.55     | 11.55     | 11.55     |
| Total (volume, mL)                                            | 9.5       | 9.5       | 9.5       | 9.5       | 9.5       |
| <i>Dispersed organic phase (mL)</i>                           |           |           |           |           |           |
| Toluene                                                       | 34.60     | 34.60     | 34.60     | 34.60     | 34.60     |
| FMA                                                           | 1.73      | 1.73      | 1.73      | 1.03      | 2.76      |
| Total                                                         | 36.33     | 36.33     | 36.33     | 35.63     | 37.36     |
| Initiators added after HIPE formation                         |           |           |           |           |           |
| APS                                                           | 0.15      | 0.15      | 0.15      | 0.15      | 0.15      |
| TEMED                                                         | 0.08      | 0.08      | 0.08      | 0.08      | 0.08      |
| DEAEMA content (%)                                            | 19.61     | 35.29     | 50.98     | 35.29     | 35.29     |
| FMA content (%)                                               | 4.76      | 4.76      | 4.76      | 2.89      | 7.39      |
| Dispersed phase fraction (%)                                  | 79.3      | 79.3      | 79.3      | 78.9      | 79.7      |
| Double-bond concentration within the continuous phase (mol/L) |           |           |           |           |           |
|                                                               | 3.72      | 3.31      | 2.90      | 3.31      | 3.31      |
| Double-bond concentration within the dispersed phase (mol/L)  |           |           |           |           |           |
|                                                               | 0.15      | 0.15      | 0.15      | 0.09      | 0.24      |
| Theoretical density (g/cc)*                                   | 0.06-0.09 | 0.06-0.09 | 0.06-0.09 | 0.06-0.08 | 0.06-0.11 |
| Density (g/cc)                                                | 0.17      | 0.16      | 0.17      | 0.17      | 0.19      |
| Density (g/cc)**                                              | 0.19      | 0.18      | 0.19      | 0.18      | 0.19      |

\* Maximum and minimum densities were calculated with and without FMA, respectively.

\*\*Density of the corresponding RH-X-Y-Cl<sub>s</sub>.

## 2. Results and discussion

**Table S2.** Cl contents (from EDS) within the RH-35-Y-Cl<sub>s</sub>.

|                | RH-35-3-Cl  | RH-35-5-Cl | RH-35-7-Cl  |
|----------------|-------------|------------|-------------|
| Cl content (%) | 0.246±0.134 | 0.1±0.076  | 0.231±0.071 |

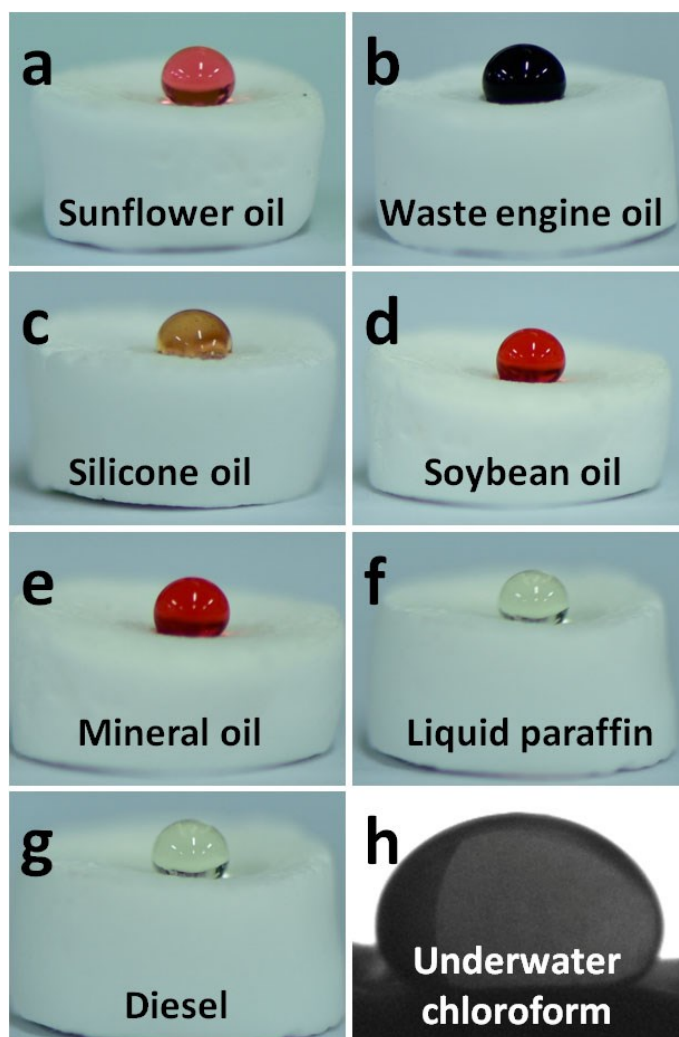

**Fig. S1** Optical images of various oils on dry RH-35-5-Cl in air: (a) sunflower oil; (b) waste engine oil; (c) silicone oil; (d) soybean oil; (e) mineral oil; (f) liquid paraffin; (g) diesel; Soybean oil, paraffin oil and mineral oil were dyed with oil red O; Micrograph of (h) chloroform on water-swollen RH-35-5-Cl under water.

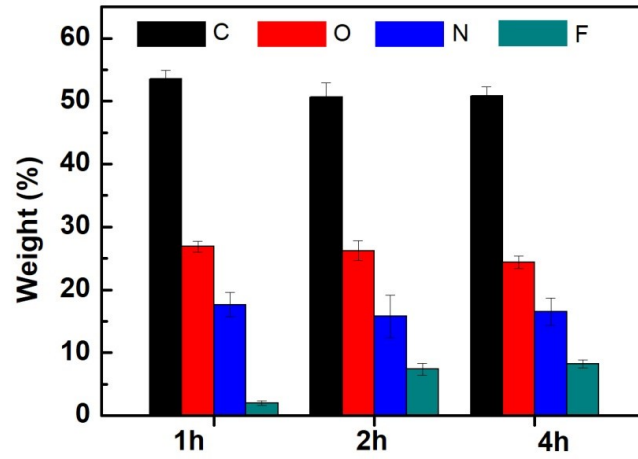

**Fig. S2** Elemental (C, O, N, F, and Cl) contents (determined by EDS) of RH-35-5 from polymerization for 1, 2 and 4 h.

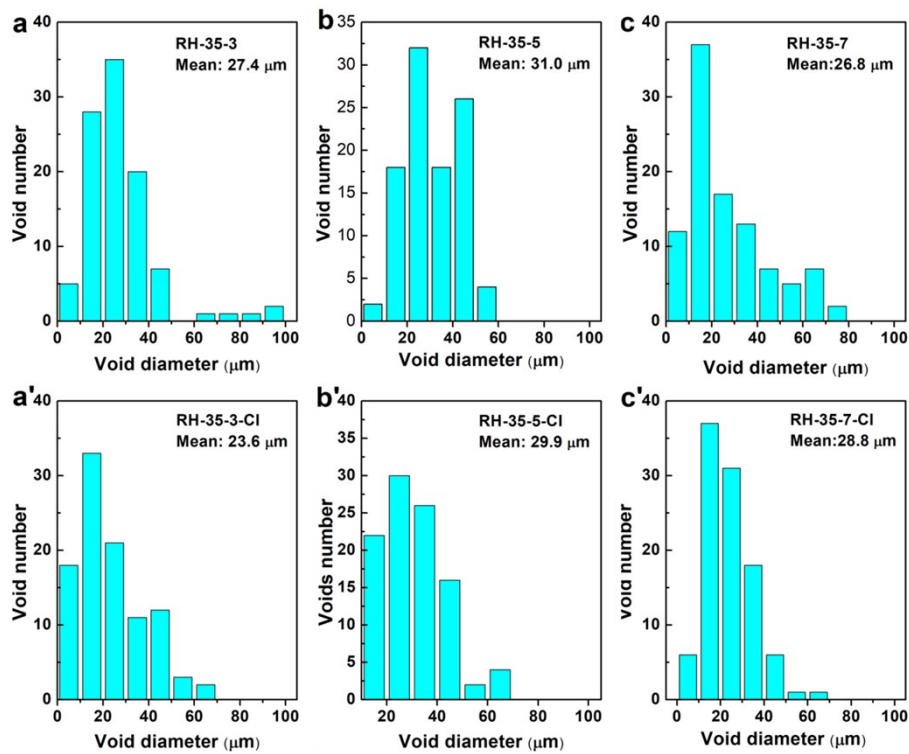

**Fig. S3** Void diameter of (a-c) the RH-35-Ys and (a'-c') the RH-35-Y-Cl: (a) RH-35-3; (b) RH-35-5; (c) RH-35-7; (a') RH-35-3-Cl; (b') RH-35-5-Cl; (c') RH-35-7-Cl.

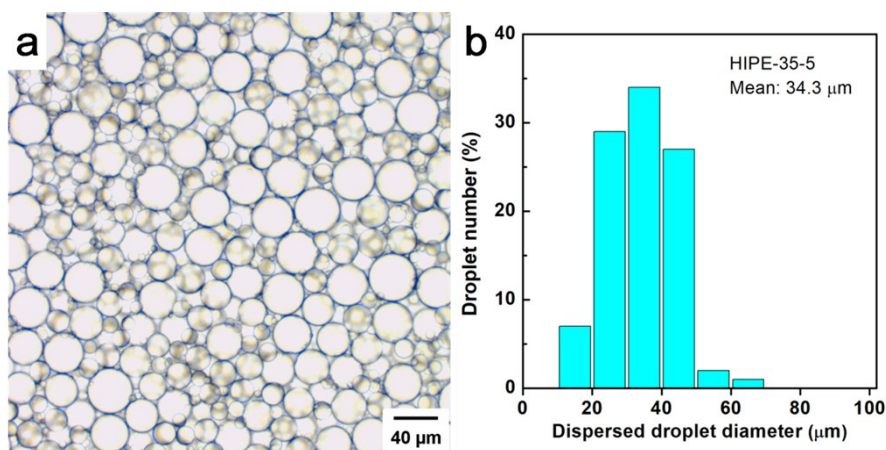

**Fig. S4** (a) A typical optical micrograph and dispersed droplet distribution of the HIPE (HIPE-35-5) for RH-35-5 preparation.

### 3. Videos

**Video 1:** To show the absorption of water under hexadecane triggered by adding an HCl solution.

**Video 2:** To show the continuous removal of water from hexadecane-water mixture under help of a peristaltic pump.
